# Supplementary material for: Vermicompost Supply Enhances Fragrant-Rice Yield by Improving Soil Fertility and Eukaryotic Microbial Community Composition under Environmental Stress Conditions
Source: MDPI journal article supplement (doi:10.3390/microorganisms12061252), 2024-06-20
Supplement: s1 [file s1]

## Supplementary Data

**Table S1.** Soil and vermicompost physiochemical attributes before experimentation

| Soil Properties                             | Content |
|---------------------------------------------|---------|
| Soil organic carbon (g kg <sup>-1</sup> )   | 9.05    |
| Total nitrogen (g kg <sup>-1</sup> )        | 0.95    |
| Total phosphorus (g kg <sup>-1</sup> )      | 0.88    |
| Total potassium (g kg <sup>-1</sup> )       | 4.22    |
| pH                                          | 5.96    |
| Available nitrogen (mg kg <sup>-1</sup> )   | 144.5   |
| Available phosphorus (mg kg <sup>-1</sup> ) | 15.3    |
| Available potassium (mg kg <sup>-1</sup> )  | 125.2   |
| Cadmium (mg kg <sup>-1</sup> )              | 2.1     |

**Table S2.** The meteorological data during the experimental time.

| Month     | Average temperature (°C) | Precipitation (mm) | Humidity (%) |
|-----------|--------------------------|--------------------|--------------|
| July      | 28.50                    | 325.55             | 84.45        |
| August    | 28.65                    | 198.45             | 82.65        |
| September | 28.20                    | 242.85             | 83.25        |
| October   | 24.50                    | 28.88              | 70.16        |
| November  | 19.60                    | 62.65              | 75.2         |

**Table S3.** Analysis of variance (ANOVA) for soil and rice physio-biochemical traits and grain yield.

| Parameters | df | SS       | MS       | F      | P    |
|------------|----|----------|----------|--------|------|
| pH         | 5  | 0.36     | 0.07     | 651**  | 0.00 |
| SOC        | 5  | 131.75   | 26.93    | 4.5*   | 0.02 |
| TN         | 5  | 0.19     | 0.04     | 27.9** | 0.00 |
| AN         | 5  | 3459.32  | 691.86   | 16**   | 0.00 |
| MBC        | 5  | 64653.80 | 12930.80 | 493**  | 0.00 |
| MBN        | 5  | 2197.06  | 439.41   | 64.1** | 0.00 |
| Root-Cd    | 5  | 76253.50 | 15250.70 | 905**  | 0.00 |
| Shoot-Cd   | 5  | 3298.18  | 659.64   | 493**  | 0.00 |
| Grain-Cd   | 5  | 4.28     | 0.86     | 3350** | 0.00 |
| GY         | 5  | 7313.64  | 1462.73  | 78.8** | 0.00 |

Note: SOC, soil organic carbon; TN, total nitrogen; AN, available nitrogen; MBC, microbial biomass carbon; MBN, microbial biomass nitrogen; Cd, cadmium; GY grain yield; df, degree of freedom; SS, sum of square; MS, mean of square; \* & \*\*Significance level at 0.05 and 0.001, respectively.

**Table S4.** The total number of operational taxonomic units in replicated form.

| SampleID | Total Tags | Taxon Tags | Unclassified Tags | Singleton Tags | OTUs |
|----------|------------|------------|-------------------|----------------|------|
| C1V1-1   | 127055     | 119492     | 5983              | 1580           | 955  |
| C1V1-2   | 108325     | 104229     | 2522              | 1574           | 958  |
| C1V1-3   | 122379     | 118546     | 2701              | 1132           | 907  |
| C1V2-1   | 121813     | 116059     | 4593              | 1161           | 903  |
| C1V2-2   | 114197     | 98637      | 14374             | 1186           | 728  |
| C1V2-3   | 117516     | 111771     | 4196              | 1549           | 842  |
| C1V3-1   | 121992     | 118047     | 1818              | 2127           | 858  |
| C1V3-2   | 106229     | 101608     | 2756              | 1865           | 910  |
| C1V3-3   | 120060     | 111889     | 5773              | 2398           | 884  |
| C2V1-1   | 113284     | 106135     | 6338              | 811            | 716  |
| C2V1-2   | 112921     | 109701     | 2361              | 859            | 661  |
| C2V1-3   | 110318     | 105594     | 2951              | 1773           | 771  |
| C2V2-1   | 121610     | 116822     | 3496              | 1292           | 791  |
| C2V2-2   | 120265     | 116592     | 1275              | 2398           | 631  |
| C2V2-3   | 110040     | 106831     | 873               | 2336           | 636  |
| C2V3-1   | 127921     | 126069     | 245               | 1607           | 691  |
| C2V3-2   | 109884     | 108236     | 177               | 1471           | 699  |
| C2V3-3   | 114115     | 105887     | 6041              | 2187           | 577  |

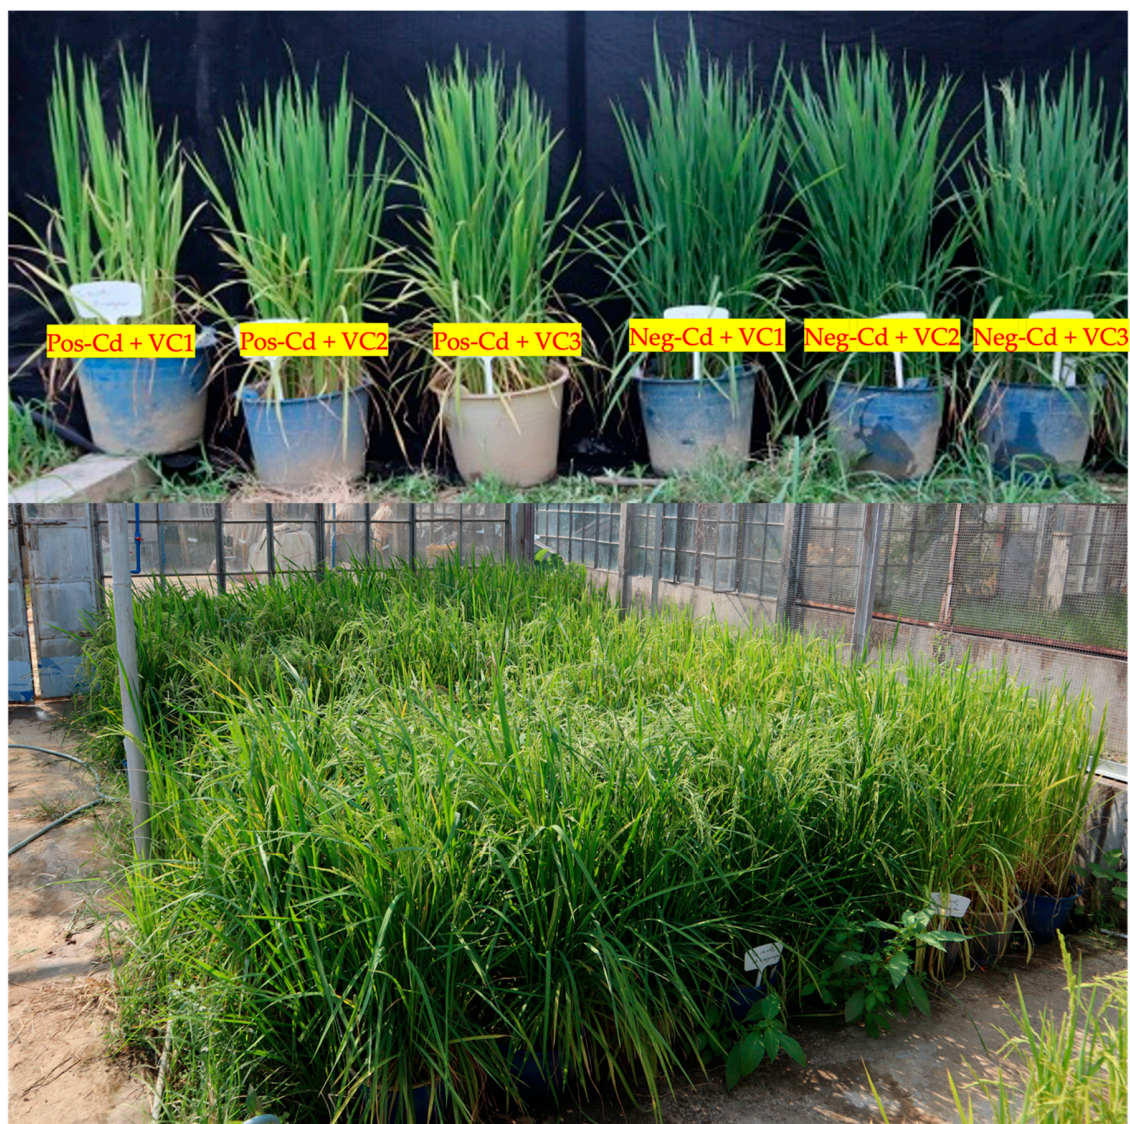

**Figure S1.** Experimental rice plants pots pictures including treatment names.

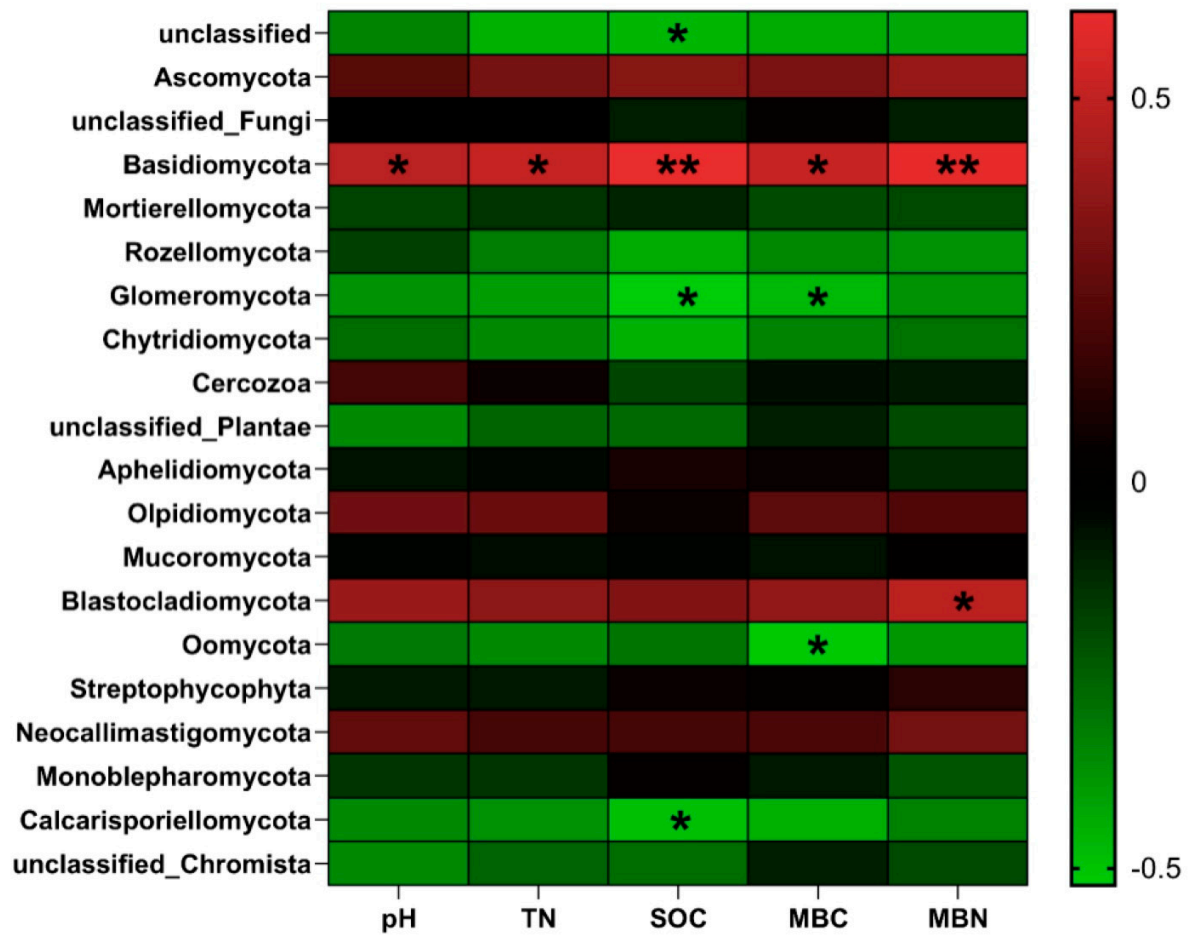

**Figure S2.** Correlation analyses between soil environmental variables and top phyla at the phylum level. The right side of the legend shows the color range and the corresponding correlation value. Note: \*=Significance level at 0.05, and \*\*=Significance level at 0.001.

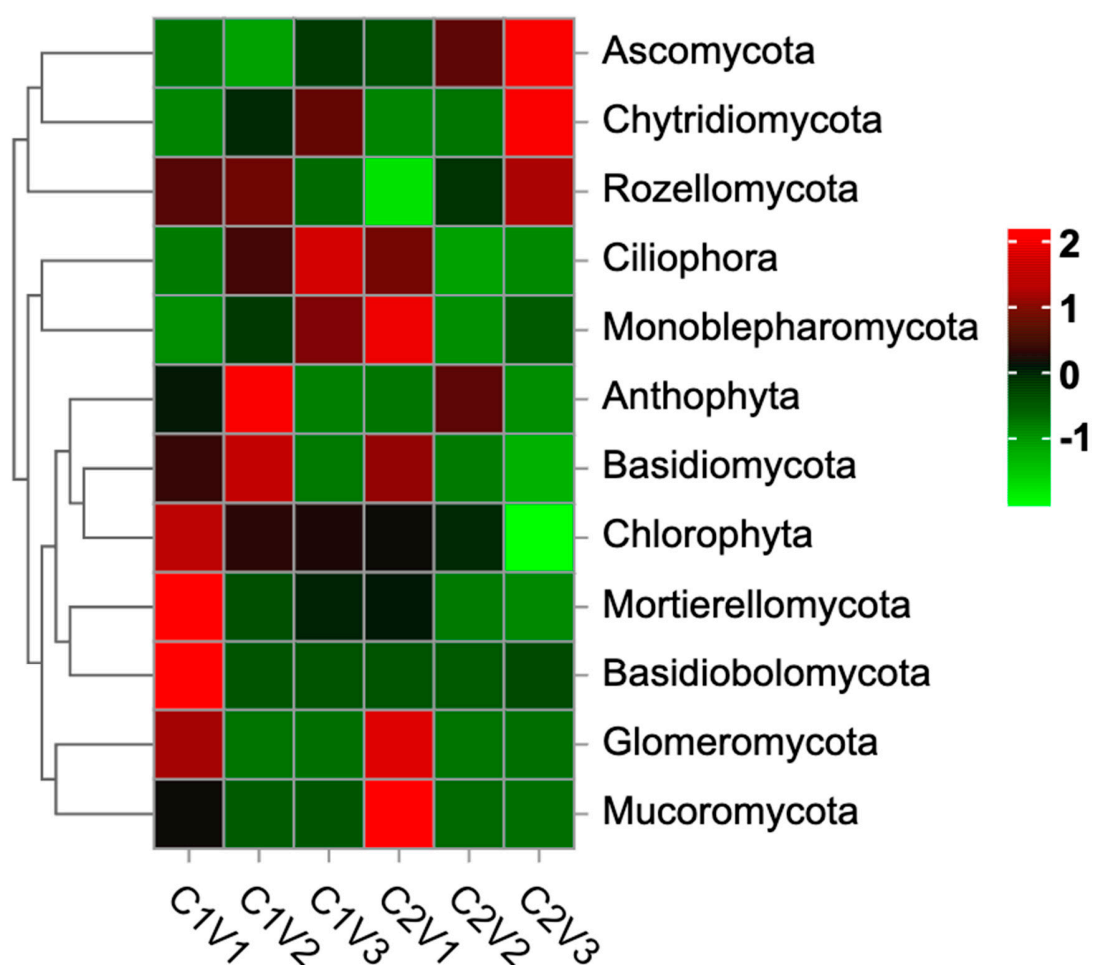

**Figure S3.** Heatmap correlation analysis between different treatments and soil and top fungal phyla at the phylum level. The right side of the legend shows the color range and the corresponding correlation value.
